# Supplementary material
Source: PubMed Central journal article supplement (PMC6487569)
Supplement: jamanetwopen-2-e193056-s001.pdf [file jamanetwopen-2-e193056-s001.pdf]

## Supplementary Online Content

Snider JT, Duncan ME, Gore MR, et al. Association between state Medicaid eligibility thresholds and deaths due to substance use disorders. *JAMA Netw Open*. 2019;2(4):e193056. doi:10.1001/jamanetworkopen.2019.3056

### **eAppendix 1.** Data Sources

**eTable 1.** Summary Statistics

**eTable 2.** Medicaid Eligibility Threshold as a Proportion of the Federal Poverty Level

**eTable 3.** Fixed Effects Regression Results

**eAppendix 2.** Results of Sensitivity Analyses

**eTable 4.** Main Sensitivity Analyses

**eTable 5.** Sensitivity Analysis Measuring Whether SUD Deaths in Previous Years Predict Policy in Current Year

**eTable 6.** Sensitivity Analysis Measuring Whether a Shortened Panel Data Demonstrated a Significant Relationship Between SUD Deaths and Medicaid Expansions

**eReferences**

This supplementary material has been provided by the authors to give readers additional information about their work.

## **eAppendix 1: Data Sources**

### **How Opioid, Drug and Alcohol Related Deaths Were Identified**

The Centers for Disease Control and Prevention (CDC) identifies drug-poisoning deaths using underlying cause-of-death codes X40–X44, X60–X64, X85, and Y10–Y14.<sup>1</sup> CDC identifies alcohol-poisoning deaths using underlying cause-of-death ICD–10 codes X45 (accidental poisoning by and exposure to alcohol), Y15 (poisoning by and exposure to alcohol, undetermined intent).<sup>2</sup> The CDC identifies opioid-related deaths based on cause-of-death codes T40.0, T40.1, T40.2, T40.3, T40.4, or T40.6.<sup>1</sup>

### **Imputation of Number of Drug Courts**

Where needed, we used linear interpolation to calculate missing numbers of adult drug court values in years between two available data points to achieve improved observation counts. The imputed number of drug courts was used in all models in lieu of the sparsely populated number of drug courts.

**eTable 1: Summary Statistics**

| <b>Binary Variables</b>                                   | <b>% of state-years with policy</b> | <b>% of state-years without policy</b> | <b>Number of observations</b> |
|-----------------------------------------------------------|-------------------------------------|----------------------------------------|-------------------------------|
| Medicaid expansion under ACA (1=expanded; 0=not expanded) | 14                                  | 86                                     | 700                           |
| Mental health parity laws (1=any; 0=none)                 | 86                                  | 14                                     | 700                           |
| Full mental health parity laws (1=yes; 0 = no)            |                                     |                                        |                               |
| Full mental health parity laws (1=yes; 0=no)              | 28                                  | 72                                     | 700                           |
| Mandatory minimum sentencing laws (1=yes; 0=no)           | 86                                  | 14                                     | 695                           |
| Good Samaritan laws (1=yes; 0=no)                         | 16                                  | 84                                     | 700                           |
| State support for naloxone programs (1=yes; 0=no)         | 14                                  | 86                                     | 700                           |
| Medical cannabis programs (1=yes; 0=no)                   | 28                                  | 72                                     | 700                           |
| <b>Continuous Variables</b>                               | <b>Mean</b>                         | <b>SD</b>                              | <b>Number of observations</b> |
| Number of drug courts per 100,000 population <sup>a</sup> | 0.39                                | 0.33                                   | 600                           |
| Total SAMHSA funding <sup>b</sup>                         | 1,061.78                            | 251.74                                 | 550                           |
| Medicaid eligibility threshold (fraction of FPL)          | 0.88                                | 0.54                                   | 691                           |
| Unemployment rate                                         | 6.62                                | 2.08                                   | 700                           |
| Median income <sup>c</sup>                                | 58,071.26                           | 8,331.83                               | 650                           |
| Fraction poverty                                          | 0.14                                | 0.03                                   | 650                           |
| Fraction black                                            | 0.13                                | 0.08                                   | 700                           |
| Fraction female                                           | 0.51                                | 0.01                                   | 700                           |
| Fraction elderly                                          | 0.13                                | 0.02                                   | 700                           |
| SUD-related deaths per 100,000 population                 | 21.15                               | 6.05                                   | 700                           |

<sup>a</sup>Number of drug courts was imputed using linear interpolation.

<sup>b</sup>Total SAMHSA funding is expressed in thousands of 2016 US dollars per 100,000 population.

<sup>c</sup>Median income is expressed in 2016 US dollars.

ACA: Affordable Care Act; CI: confidence interval; FPL: Federal poverty level; SAMHSA: Substance Abuse and Mental Health Services Administration; SUD: substance use disorder

**eTable 2: Medicaid Eligibility threshold as a proportion of the federal poverty level**

| State         | Proportion of the federal poverty level by study year <sup>3</sup> |      |      |      |      |      |      |      |      |      |      |      |      |      |
|---------------|--------------------------------------------------------------------|------|------|------|------|------|------|------|------|------|------|------|------|------|
|               | 2002                                                               | 2003 | 2004 | 2005 | 2006 | 2007 | 2008 | 2009 | 2010 | 2011 | 2012 | 2013 | 2014 | 2015 |
| Alabama       | 0.21                                                               | 0.20 | 0.19 | 0.19 | 0.26 | 0.26 | 0.25 | 0.24 | 0.24 | 0.24 | 0.24 | 0.23 | 0.16 | 0.18 |
| Alaska        | 0.79                                                               | 0.81 | 0.81 | 0.81 | 0.81 | 0.81 | 0.85 | 0.81 | 0.81 | 0.81 | 0.81 | 0.78 | 1.28 | 1.46 |
| Arizona       | 1.07                                                               | 2.00 | 2.00 | 2.00 | 2.00 | 2.00 | 2.00 | 1.06 | 1.06 | 1.06 | 1.06 | 1.06 | 1.38 | 1.38 |
| Arkansas      | 0.21                                                               | 0.20 | 0.20 | 0.19 | 0.18 | 0.18 | 0.17 | 0.17 | 0.17 | 0.17 | 0.17 | 0.16 | 1.38 | 1.38 |
| California    | 1.07                                                               | 1.07 | 1.07 | 1.07 | 1.07 | 1.06 | 1.06 | 1.06 | 1.06 | 1.06 | 1.06 | 1.06 | 1.38 | 1.38 |
| Colorado      | 0.42                                                               | 0.47 | 0.39 | 0.38 | 0.67 | 0.66 | 0.66 | 0.66 | 0.66 | 1.06 | 1.06 | 1.06 | 1.38 | 1.38 |
| Connecticut   | 1.57                                                               | 1.07 | 1.07 | 1.57 | 1.57 | 1.91 | 1.91 | 1.91 | 1.91 | 1.91 | 1.91 | 1.91 | 2.01 | 2.01 |
| Delaware      | 1.22                                                               | 1.20 | 1.17 | 1.07 | 1.07 | 1.06 | 1.21 | 1.21 | 1.21 | 1.20 | 1.19 | 1.20 | 1.38 | 1.38 |
| Florida       | 0.66                                                               | 0.63 | 0.62 | 0.60 | 0.58 | 0.56 | 0.55 | 0.53 | 0.53 | 0.59 | 0.58 | 0.56 | 0.35 | 0.34 |
| Georgia       | 0.62                                                               | 0.59 | 0.58 | 0.56 | 0.55 | 0.53 | 0.52 | 0.50 | 0.50 | 0.50 | 0.49 | 0.48 | 0.39 | 0.38 |
| Hawaii        | 1.00                                                               | 1.00 | 1.00 | 1.00 | 1.00 | 1.00 | 1.00 | 1.00 | 1.00 | 1.00 | 1.00 | 1.38 | 1.38 | 1.38 |
| Idaho         | 0.33                                                               | 0.32 | 0.32 | 0.30 | 0.43 | 0.42 | 0.28 | 0.27 | 0.27 | 0.39 | 0.39 | 0.37 | 0.27 | 0.27 |
| Illinois      | 0.56                                                               | 0.83 | 1.40 | 1.92 | 1.92 | 1.91 | 1.85 | 1.85 | 1.85 | 1.91 | 1.91 | 1.39 | 1.38 | 1.38 |
| Indiana       | 0.31                                                               | 0.30 | 0.29 | 0.28 | 0.27 | 0.26 | 0.26 | 0.25 | 0.25 | 0.36 | 0.24 | 0.24 | 0.24 | 0.24 |
| Iowa          | 0.87                                                               | 0.84 | 0.82 | 0.79 | 0.77 | 0.89 | 0.86 | 0.83 | 0.83 | 0.83 | 0.82 | 0.80 | 1.38 | 1.38 |
| Kansas        | 0.40                                                               | 0.39 | 0.38 | 0.37 | 0.36 | 0.34 | 0.34 | 0.32 | 0.32 | 0.32 | 0.32 | 0.31 | 0.38 | 0.38 |
| Kentucky      | 0.75                                                               | 0.71 | 0.70 | 0.68 | 0.66 | 0.64 | 0.62 | 0.62 | 0.62 | 0.62 | 0.59 | 0.57 | 1.38 | 1.38 |
| Louisiana     | 0.22                                                               | 0.21 | 0.20 | 0.20 | 0.20 | 0.20 | 0.26 | 0.25 | 0.25 | 0.25 | 0.25 | 0.24 | 0.24 | 0.24 |
| Maine         | 1.57                                                               | 1.57 | 1.57 | 1.57 | 2.07 | 2.06 | 1.06 | 1.06 | 2.06 | 2.00 | 2.00 | 2.00 | 1.05 | 1.05 |
| Maryland      | 0.43                                                               | 0.41 | 0.40 | 0.38 | 0.38 | 0.37 | 1.16 | 1.16 | 1.16 | 1.16 | 1.16 | 1.22 | 1.38 | 1.38 |
| Massachusetts | 1.33                                                               | 1.33 | 1.33 | 1.33 | 1.33 | 1.33 | 1.33 | 1.33 | 1.33 | 1.33 | 1.33 | 1.33 | 1.38 | 1.38 |
| Michigan      | 0.63                                                               | 0.61 | 0.59 | 0.58 | 0.61 | 0.61 | 0.66 | 0.64 | 0.64 | 0.64 | 0.63 | 0.64 | 1.38 | 1.38 |
| Minnesota     | 2.75                                                               | 2.75 | 2.75 | 2.75 | 2.75 | 2.75 | 2.75 | 2.15 | 2.15 | 2.15 | 2.15 | 2.15 | 2.05 | 1.38 |
| Mississippi   | 0.38                                                               | 0.36 | 0.35 | 0.34 | 0.33 | 0.32 | 0.46 | 0.44 | 0.44 | 0.44 | 0.44 | 0.29 | 0.29 | 0.28 |
| Missouri      | 1.07                                                               | 0.84 | 0.82 | 0.42 | 0.40 | 0.39 | 0.26 | 0.25 | 0.25 | 0.37 | 0.36 | 0.35 | 0.24 | 0.23 |
| Montana       | 0.69                                                               | 0.67 | 0.65 | 0.64 | 0.62 | 0.60 | 0.58 | 0.56 | 0.56 | 0.56 | 0.55 | 0.54 | 0.52 | 0.51 |
| Nebraska      | 0.55                                                               | 0.57 | 0.56 | 0.60 | 0.58 | 0.59 | 0.58 | 0.58 | 0.58 | 0.58 | 0.57 | 0.58 | 0.55 | 0.55 |
| Nevada        | 0.90                                                               | 0.88 | 0.87 | 0.84 | 0.86 | 0.94 | 0.91 | 0.88 | 0.88 | 0.88 | 0.87 | 0.84 | 1.38 | 1.38 |
| New Hampshire | 0.62                                                               | 0.61 | 0.60 | 0.58 | 0.56 | 0.55 | 0.51 | 0.49 | 0.49 | 0.49 | 0.49 | 0.47 | 0.75 | 1.38 |
| New Jersey    | 2.00                                                               | 0.42 | 0.41 | 1.00 | 1.15 | 1.33 | 2.00 | 2.00 | 2.00 | 2.00 | 2.00 | 2.00 | 1.38 | 1.38 |
| New Mexico    | 0.58                                                               | 0.71 | 0.69 | 0.67 | 0.65 | 0.63 | 0.69 | 0.67 | 0.67 | 0.67 | 0.85 | 0.85 | 1.38 | 1.38 |
| New York      | 1.33                                                               | 1.50 | 1.50 | 1.50 | 1.50 | 1.50 | 1.50 | 1.50 | 1.50 | 1.50 | 1.50 | 1.50 | 1.38 | 1.38 |

|                |                                                               |      |      |      |      |      |      |      |      |      |      |      |      |      |      |
|----------------|---------------------------------------------------------------|------|------|------|------|------|------|------|------|------|------|------|------|------|------|
| North Carolina | 0.62                                                          | 0.59 | 0.57 | 0.56 | 0.54 | 0.52 | 0.51 | 0.49 | 0.49 | 0.49 | 0.49 | 0.47 | 0.45 | 0.45 |      |
| North Dakota   | 1.10                                                          | 0.94 | 0.69 | 0.67 | 0.65 | 0.63 | 0.62 | 0.59 | 0.59 | 0.59 | 0.59 | 0.57 | 1.38 | 1.38 |      |
| Ohio           | 1.00                                                          | 1.00 | 1.00 | 0.90 | 0.90 | 0.90 | 0.90 | 0.90 | 0.90 | 0.90 | 0.90 | 0.96 | 1.38 | 1.38 |      |
| Oklahoma       | 0.48                                                          | 0.46 | 0.45 | 0.44 | 0.43 | 0.50 | 0.48 | 0.47 | 0.47 | 0.53 | 0.53 | 0.51 | 0.48 | 0.46 |      |
| Oregon         | 1.00                                                          | 1.00 | 1.00 | 1.00 | 1.00 | 1.00 | 1.00 | 0.40 | 0.40 | 0.40 | 0.40 | 0.39 | 1.38 | 1.38 |      |
| Pennsylvania   | 0.56                                                          | 0.66 | 0.66 | 0.63 | 0.61 | 0.59 | 0.36 | 0.34 | 0.34 | 0.46 | 0.46 | 0.58 | 0.38 | 1.38 |      |
| Rhode Island   | Medicaid eligibility threshold not recorded in data 2002-2010 |      |      |      |      |      |      |      |      |      | 1.81 | 1.81 | 1.81 | 1.38 | 1.38 |
| South Carolina | 1.00                                                          | 0.98 | 0.97 | 0.97 | 0.97 | 1.00 | 0.90 | 0.89 | 0.89 | 0.93 | 0.91 | 0.89 | 0.67 | 0.67 |      |
| South Dakota   | 0.65                                                          | 0.63 | 0.61 | 0.59 | 0.58 | 0.56 | 0.54 | 0.52 | 0.52 | 0.52 | 0.52 | 0.50 | 0.54 | 0.53 |      |
| Tennessee      | 0.81                                                          | 1.00 | 1.00 | 0.81 | 0.80 | 0.80 | 1.34 | 1.29 | 1.29 | 1.27 | 1.26 | 1.22 | 1.11 | 1.03 |      |
| Texas          | 0.32                                                          | 0.34 | 0.33 | 0.30 | 0.29 | 0.28 | 0.27 | 0.26 | 0.26 | 0.26 | 0.26 | 0.25 | 0.19 | 0.19 |      |
| Utah           | 0.55                                                          | 0.53 | 0.53 | 0.50 | 0.49 | 0.47 | 0.68 | 0.44 | 0.44 | 0.44 | 0.44 | 0.42 | 0.47 | 0.46 |      |
| Vermont        | 1.92                                                          | 1.92 | 1.92 | 1.91 | 1.92 | 1.91 | 1.91 | 1.91 | 1.91 | 1.91 | 1.91 | 1.91 | 1.38 | 1.38 |      |
| Virginia       | 0.31                                                          | 0.37 | 0.36 | 0.31 | 0.31 | 0.31 | 0.30 | 0.29 | 0.29 | 0.31 | 0.31 | 0.30 | 0.52 | 0.45 |      |
| Washington     | 2.00                                                          | 0.86 | 0.86 | 0.76 | 0.79 | 0.76 | 0.77 | 0.74 | 0.74 | 0.74 | 0.73 | 0.71 | 1.38 | 1.38 |      |
| Washington, DC | 2.00                                                          | 2.00 | 2.00 | 2.00 | 2.07 | 2.07 | 2.07 | 2.07 | 2.07 | 2.07 | 2.06 | 2.06 | 2.21 | 2.21 |      |
| West Virginia  | 0.28                                                          | 0.39 | 0.38 | 0.35 | 0.36 | 0.35 | 2.00 | 0.33 | 0.33 | 0.33 | 0.32 | 0.31 | 1.38 | 1.38 |      |
| Wisconsin      | 1.85                                                          | 1.85 | 1.92 | 1.91 | 1.92 | 1.91 | 0.34 | 2.00 | 2.00 | 2.00 | 2.00 | 2.00 | 1.00 | 1.00 |      |
| Wyoming        | 0.65                                                          | 0.62 | 0.60 | 0.55 | 0.57 | 0.55 | 0.54 | 0.52 | 0.52 | 0.52 | 0.51 | 0.50 | 0.59 | 0.58 |      |

**eTable 3: Fixed Effects Regression Results**

| Policy                                            | Coefficient (Outcome: SUD Deaths)<br>(95% CI) |
|---------------------------------------------------|-----------------------------------------------|
| Medicaid eligibility (% FPL before and after ACA) | -1.373**<br>(-2.732, -0.014)                  |
| Mental health parity laws (Any)                   | -0.809<br>(-2.148, 0.529)                     |
| Mandatory minimum sentencing laws                 | -1.838*<br>(-3.829, 0.153)                    |
| Number of drug courts <sup>a</sup>                | 4.632***<br>(2.299, 6.964)                    |
| Good Samaritan laws                               | -0.555<br>(-1.952, 0.842)                     |
| State support for naloxone programs               | 1.316**<br>(0.037, 2.596)                     |
| Medical cannabis programs                         | 2.918***<br>(1.578, 4.257)                    |
| Demographic covariates                            | Included                                      |
| Economic controls                                 | Included                                      |
| Observations                                      | 538                                           |

\*p<0.1; \*\*, p<0.05; \*\*\*p<0.01

<sup>a</sup>Number of drug courts was imputed using linear interpolation.

ACA: Affordable Care Act; CI: confidence interval; FPL: federal poverty level; SUD: substance use disorder.

Results were estimated using a fixed effects regression model of SUD-related deaths on Medicaid eligibility threshold with economic controls (the state's unemployment rate, median household income, and fraction of the state population with income below the federal poverty level), demographic controls (the fractions of state population that were black, elderly (65+), and female) and other policy controls (listed in the table).

## **eAppendix 2: Results of Sensitivity Analyses**

The results of the alternative specifications of our base case model are presented in eTable 4.

Additional policies included in the sensitivity analyses were:

1. Medicaid expansion status under the ACA;
2. Existence of full mental health parity laws;
3. SAMHSA funding.

Medicaid expansion status under the ACA was not included in the base case analysis because it is somewhat redundant with the Medicaid eligibility threshold and minimally affects the data; since we examined the effect of policies in 2002-2014 on SUD-related deaths in 2003-2015, the last year of policies in the data is 2014. This implies that the expansion variable affects 2 years of data out of a total 14, as states could not implement Medicaid expansions prior to 2013 without a special waiver. SAMHSA funding and existence of full mental health parity laws were excluded from the base case and chosen as controls for the sensitivity analyses instead because both were sparsely populated.

**eTable 4: Main Sensitivity Analyses**

| Policy                                            | SA1: Year fixed effects<br>Coefficient<br>(95% CI) | SA2: Vary control policy variables<br>Coefficient<br>(95% CI) |                             |                            | SA3: No population weights<br>Coefficient<br>(95% CI) |
|---------------------------------------------------|----------------------------------------------------|---------------------------------------------------------------|-----------------------------|----------------------------|-------------------------------------------------------|
|                                                   |                                                    | Medicaid expansion                                            | SAMHSA funding              | Full mental health parity  |                                                       |
| Medicaid eligibility (% FPL before and after ACA) | -1.555**<br>(-2.939, -0.171)                       | -1.371**<br>(-2.735, -0.007)                                  | -1.86**<br>(-3.660, -0.060) | -1.304*<br>(-2.634, 0.026) | -1.852*<br>(-3.721, 0.016)                            |
| Medicaid expansion under the ACA                  | Not included                                       | -0.067<br>(-1.266, 1.132)                                     | Not included                | Not included               | Not included                                          |
| SAMHSA funding                                    | Not included                                       | Not included                                                  | 0<br>(-0.002, 0.002)        | Not included               | Not included                                          |
| Mental health parity laws (Full)                  | Not included                                       | Not included                                                  | Not included                | 0.972<br>(-0.207, 2.151)   | Not included                                          |
| Mental health parity laws (Any)                   | -0.635<br>(-1.783, 0.514)                          | -0.822<br>(-2.206, 0.562)                                     | -0.229<br>(-1.970, 1.511)   | Not included               | -0.443<br>(-1.780, 0.894)                             |
| Mandatory minimum sentencing laws                 | -1.936*<br>(-3.978, 0.107)                         | -1.824*<br>(-3.866, 0.218)                                    | -1.315<br>(-3.680, 1.049)   | -1.544<br>(-3.211, 0.123)  | -1.061<br>(-3.678, 1.556)                             |
| Number of drug courts <sup>a</sup>                | 4.728***<br>(2.431, 7.026)                         | 4.621***<br>(2.244, 6.997)                                    | 4.736***<br>(1.362, 8.109)  | 4.557***<br>(2.190, 6.924) | 4.319***<br>(1.274, 7.365)                            |
| Good Samaritan laws                               | -0.798<br>(-2.053, 0.456)                          | -0.543<br>(-2.048, 0.962)                                     | -0.987<br>(-2.268, 0.294)   | -0.663<br>(-1.982, 0.655)  | -0.292<br>(-1.711, 1.127)                             |
| State support for naloxone programs               | 0.989*<br>(-0.090, 2.068)                          | 1.305*<br>(-0.050, 2.660)                                     | 0.671<br>(-0.487, 1.829)    | 0.585<br>(-0.703, 1.873)   | 0.783<br>(-0.370, 1.936)                              |
| Medical cannabis programs                         | 2.784***<br>(1.535 - 4.034)                        | 2.921***<br>(1.587, 4.255)                                    | 2.665***<br>(1.305, 4.025)  | 3.172***<br>(1.853, 4.491) | 2.464***<br>(0.950, 3.978)                            |
| Demographic covariates                            | Included                                           | Included                                                      | Included                    | Included                   | Included                                              |
| Economic covariates                               | Included                                           | Included                                                      | Included                    | Included                   | Included                                              |
| Observations                                      | 538                                                | 538                                                           | 442                         | 538                        | 538                                                   |

\*p<0.1; \*\*p<0.05; \*\*\*p<0.01

<sup>a</sup>Number of drug courts was imputed using linear interpolation.

ACA: Affordable Care Act; CI: confidence interval; FPL: federal poverty level; SA: sensitivity analysis; SAMHSA: Substance Abuse and Mental Health Services Administration; SUD: substance use disorders.



**eTable 5. Sensitivity Analysis Measuring Whether SUD Deaths in Previous Years Predict Policy in Current Year<sup>a</sup>**

| Policy <sup>b</sup>                               | Coefficient of SUD Deaths in Previous Year<br>(Standard Error) |
|---------------------------------------------------|----------------------------------------------------------------|
| Medicaid eligibility (% FPL before and after ACA) | -0.00574<br>(-0.0357, 0.0242)                                  |
| Medicaid expansion under ACA                      | 0.00107<br>(-0.00764, 0.00978)                                 |
| Mental health parity laws (Any)                   | 0.00816<br>(-0.0087, 0.0250)                                   |
| Full mental health parity laws                    | -0.00292<br>(-0.0222, 0.0163)                                  |
| Mandatory minimum sentencing laws                 | -0.00418<br>(-0.0203, 0.0119)                                  |
| Number of drug courts                             | 0.0138*<br>(-0.00261, 0.0303)                                  |
| Good Samaritan laws                               | 0.00381<br>(-0.00732, 0.0149)                                  |
| State support for naloxone programs               | 0.0106<br>(-0.00212, 0.0234)                                   |
| Medical cannabis programs                         | 0.0370***<br>(0.0225, 0.0515)                                  |
| Total SAMHSA funding                              | 15.79***<br>(6.041, 25.55)                                     |

\*\*\* p<0.01, \*\* p<0.05, \* p<0.1

<sup>a</sup>Economic, population, and quadratic time trends controls were included in each model.

<sup>b</sup>Each policy had a separate regression.

ACA: Affordable Care Act; CI: confidence interval; FPL: federal poverty level; SA: sensitivity analysis; SAMHSA: Substance Abuse and Mental Health Services Administration; SUD: substance use disorders.

**eTable 6. Sensitivity Analysis Measuring Whether a Shortened Panel Data Demonstrated a Significant Relationship between SUD Deaths and Medicaid Expansions<sup>a</sup>**

| Policy (Lagged by 1 Year)                         | Coefficient of SUD Deaths in Current Year<br>(95% CI) |
|---------------------------------------------------|-------------------------------------------------------|
| Medicaid eligibility (% FPL before and after ACA) | 0.404<br>(-2.349, 3.157)                              |
| Mental health parity laws (Any)                   | 0.326<br>(-0.775, 1.426)                              |
| Mandatory minimum sentencing laws                 | -3.211***<br>(-5.020, -1.401)                         |
| Number of drug courts <sup>b</sup>                | 2.758<br>(-5.933, 11.45)                              |
| Good Samaritan laws                               | -0.491<br>(-1.272, 0.289)                             |
| State support for naloxone programs               | 0.184<br>(-1.188, 1.556)                              |
| Medical cannabis programs                         | 2.259*<br>(-0.150, 4.669)                             |

\*\*\* p<0.01, \*\* p<0.05, \* p<0.1

<sup>a</sup>Base case analysis covered 2002-2015; this analysis covers 2010-2015, with 199 observations. Economic, population, quadratic time trends controls, and state fixed effects were included in the model.

<sup>b</sup>Number of drug courts was imputed using linear interpolation.

ACA: Affordable Care Act; CI: confidence interval; SUD: substance use disorder.

## eReferences

1. Centers for Disease Control and Prevention. Injury Prevention and Control: Opioid Overdose State Data. 2016; <http://www.cdc.gov/drugoverdose/data/statedeaths.html>. Accessed 11/10/2016.
2. Centers for Disease Control and Prevention. Alcohol Poisoning Deaths Infographic. 2015; <http://www.cdc.gov/vitalsigns/alcohol-poisoning-deaths/infographic.html#infographic> Accessed 11/10/2016.
3. Kaiser Family Foundation. Medicaid Income Eligibility Limits for Parents, 2002-2017. 2017; <http://www.kff.org/medicaid/state-indicator/medicaid-income-eligibility-limits-for-parents/?currentTimeframe=0&sortModel=%7B%22colId%22:%22Location%22,%22sort%22:%22asc%22%7D>. Accessed January 24, 2017.
